# Supplementary material for: The correlation between serum angiopoietin-2 levels and acute kidney injury (AKI): a meta-analysis
Source: publisher site journal article supplement (doi:10.1515/cclm-2024-0365), 2024-06-25
Supplement: Supplementary file 2 [file j_cclm-2024-0365_suppl_006.docx]

**Table S1. Literature quality assessment based on the 9-star NOS.**

| study | Representativeness of the exposed cohort | Selection of the non-exposed cohort | Ascertainment of exposure | Comparability of cohorts on the basis of the design or analysis | Comparability of cohorts on the basis of the measurement | Assessment of outcome | Was follow-up long enough for outcomes to occur | adequacy of follow up of cohorts | total scores |
| --- | --- | --- | --- | --- | --- | --- | --- | --- | --- |
| Yu 2021 | 1 | 1 | 1 | 2 | 1 | 1 | 1 | 1 | 9 |
| Sporek 2016 | 1 | 1 | 1 | 2 | 1 | 1 | 1 | 1 | 9 |
| Robinson-Cohen 2016 | 1 | 1 | 1 | 2 | 1 | 1 | 1 | 1 | 9 |
| Mansour 2022 | 1 | 1 | 1 | 2 | 1 | 1 | 1 | 1 | 9 |
| Liu 2014 | 1 | 1 | 1 | 2 | 1 | 1 | 1 | 1 | 9 |
| Jongman 2015 | 1 | 1 | 1 | 2 | 1 | 1 | 1 | 1 | 9 |
| Conroy 2022 | 1 | 1 | 1 | 2 | 1 | 1 | 1 | 1 | 9 |
| Atreya 2023 | 1 | 1 | 1 | 2 | 1 | 1 | 1 | 1 | 9 |
| Kwong 2020 | 1 | 1 | 1 | 2 | 1 | 1 | 1 | 1 | 9 |
| Ouma 2020 | 1 | 1 | 1 | 2 | 1 | 1 | 1 | 1 | 9 |
| Fisher 2016 | 1 | 1 | 1 | 2 | 1 | 1 | 1 | 1 | 9 |
| Allegretti 2019 | 1 | 1 | 1 | 2 | 1 | 1 | 1 | 1 | 9 |
| Poss 2015 | 1 | 1 | 1 | 2 | 1 | 1 | 1 | 1 | 9 |
| Kumpers 2010 | 1 | 1 | 1 | 2 | 1 | 1 | 1 | 1 | 9 |
